# Supplementary material for: Vivid structural colors with low angle dependence from long-range ordered photonic crystal films
Source: Royal Society of Chemistry journal article supplement (doi:10.1039/c6nr07523a), 2016-11-30
Supplement: c6nr07523a1.pdf [file c6nr07523a1.pdf]

## Supporting Information

### Vivid Structural Colors from Long-range Ordered Photonic Crystal Films with Low Angle-dependence

Xin Su, Hongbo Xia, Shufen Zhang, Bingtao Tang, Suli Wu\*

State Key Laboratory of Fine Chemicals, Dalian University of Technology, Dalian, P.R.China

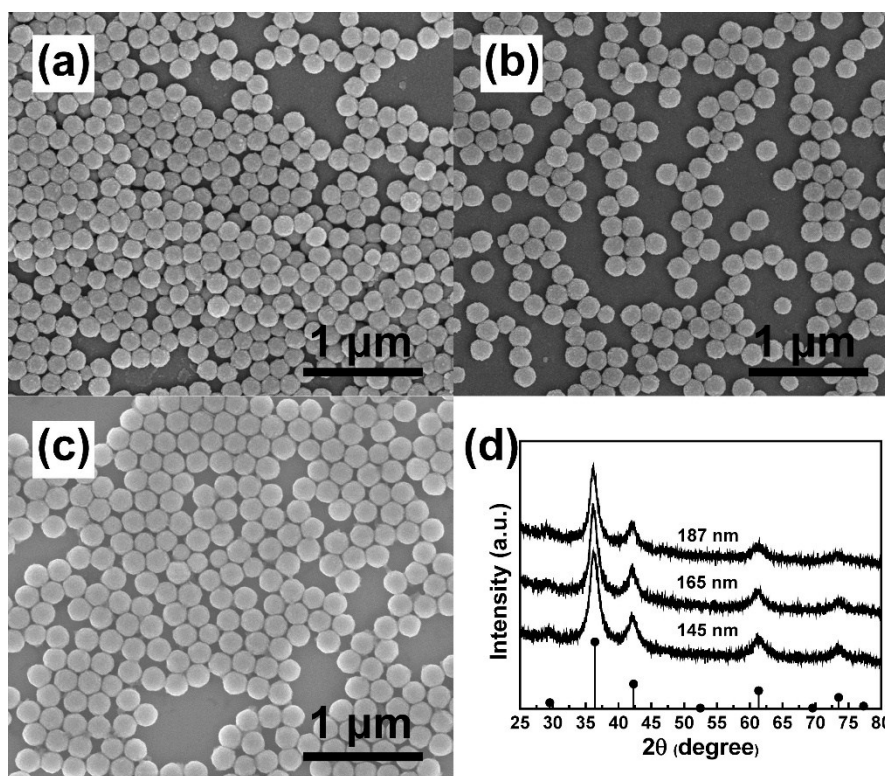

**Figure S1.** SEM images of monodisperse Cu<sub>2</sub>O spheres with different diameters: (a) 145 nm; (b) 165 nm; (c) 187 nm; (d) XRD patterns of Cu<sub>2</sub>O products of a~c

**Table S1** Measured and calculated stop band peak positions of Cu<sub>2</sub>O photonic crystals built from spheres in different diameters.

|     | M145<br>[nm] | C145<br>[nm] | M165<br>[nm] | C165<br>[nm] | M187<br>[nm] | C187<br>[nm] |
|-----|--------------|--------------|--------------|--------------|--------------|--------------|
| 10° | 510          | 561          | 581          | 639          | 622          | 724          |
| 20° | 506          | 557          | 580          | 634          | 617          | 718          |
| 30° | 502          | 550          | 573          | 626          | 608          | 710          |
| 45° | 496          | 537          | 566          | 611          | 599          | 693          |
| 60° | 488          | 524          | 556          | 596          | 590          | 676          |

M145 nm, M165 nm and M187 nm stand for measured results of Cu<sub>2</sub>O photonic crystals built from spheres in these three diameters. C145 nm, C165 nm and C187 nm stand for corresponding calculated results.

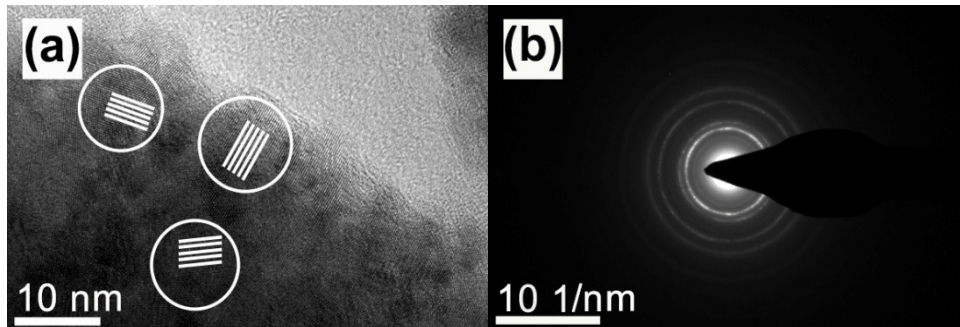

**Figure S2** (a) TEM image of a typical Cu<sub>2</sub>O sphere showing the randomly oriented nanocrystals inside; (b) Selected-area electron diffraction image of a Cu<sub>2</sub>O sphere

**Table S2** Calculated and measured peak positions of PS photonic crystal (built from 240 nm PS spheres)

| Incident angle | Calculated (nm) | Measured (nm) |
|----------------|-----------------|---------------|
| 10°            | 568             | 574           |
| 20°            | 556             | 562           |
| 30°            | 538             | 544           |
| 45°            | 500             | 510           |

**Table S3** Calculated and measured peak positions of SiO<sub>2</sub> photonic crystal (built from 270 nm SiO<sub>2</sub> spheres)

| Incident angle | Calculated (nm) | Measured (nm) |
|----------------|-----------------|---------------|
| 10°            | 592             | 604           |
| 20°            | 578             | 588           |
| 30°            | 555             | 562           |
| 45°            | 509             | 513           |

**Table S4** Calculated and measured peak positions of PS photonic crystal (built from 193 nm PS spheres)

| Incident angle | Calculated (nm) | Measured (nm) |
|----------------|-----------------|---------------|
| 10°            | 457             | 462           |
| 20°            | 447             | 452           |
| 30°            | 432             | 438           |
| 45°            | 402             | 413           |

**Table S5** Calculated and measured peak positions of SiO<sub>2</sub> photonic crystal (built from 185 nm SiO<sub>2</sub> spheres)

| Incident angle | Calculated (nm) | Measured (nm) |
|----------------|-----------------|---------------|
| 10°            | 406             | 400           |
| 20°            | 396             | 390           |
| 30°            | 380             | 375           |
| 45°            | 349             | 344           |

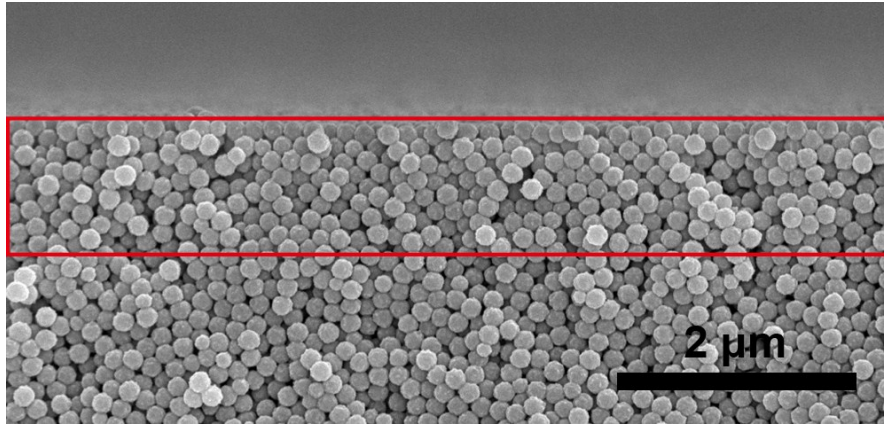

Figure S3 SEM image of cross-section in the Cu<sub>2</sub>O opal film obtained from 165 nm spheres

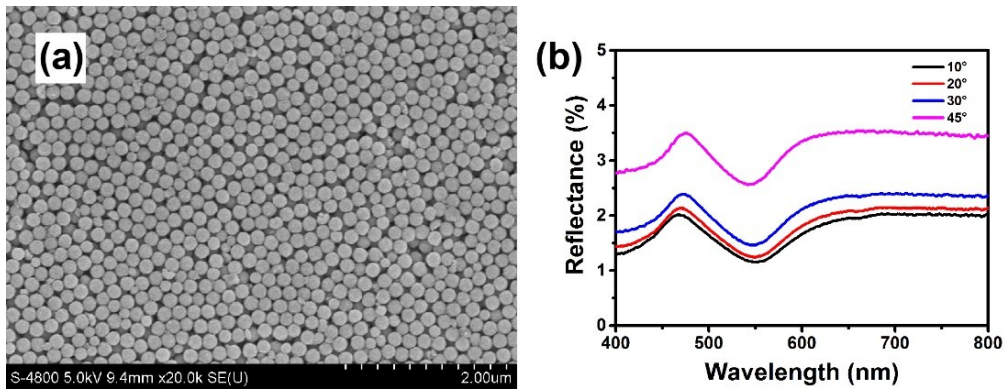

Figure S4 (a) SEM image and (b) reflection spectrum of Cu<sub>2</sub>O film with disordered arrays

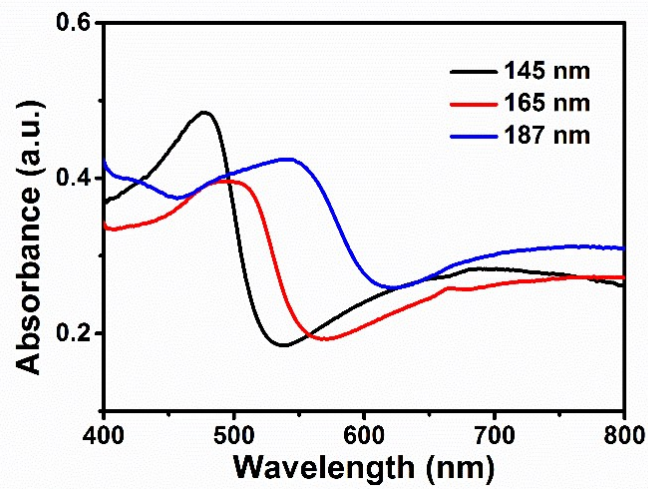

**Figure S5** Absorption spectra of  $\text{Cu}_2\text{O}$  photonic crystal films with spheres in different diameters

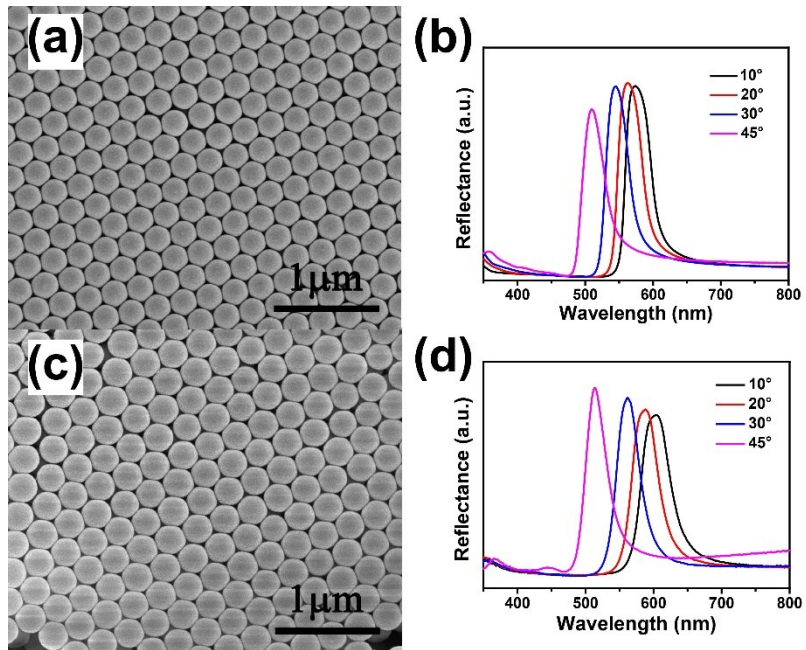

**Figure S6** (a) SEM image of the photonic crystal film built from 240 nm PS spheres; (b) UV-vis reflection spectrum taken from the PS photonic crystal film; (c) SEM image of the photonic crystal film built from 270 nm  $\text{SiO}_2$  spheres; (d) UV-vis reflection spectrum taken from the  $\text{SiO}_2$  photonic crystal film

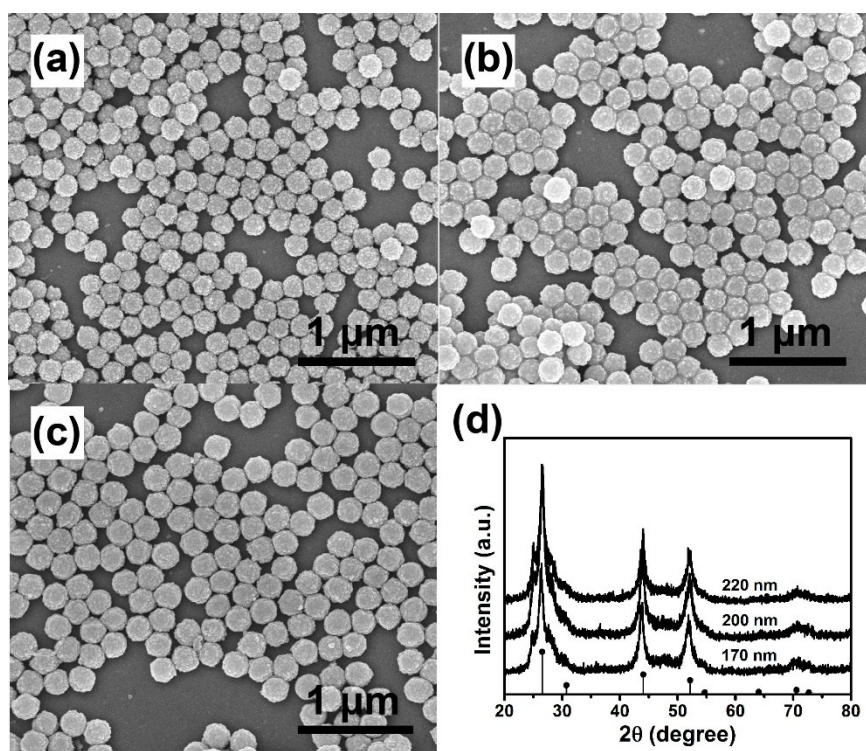

**Figure S7.** SEM images of monodisperse CdS spheres with different diameters: (a) 170 nm; (b) 200 nm; (c) 220 nm; (d) XRD patterns of CdS products of a~c

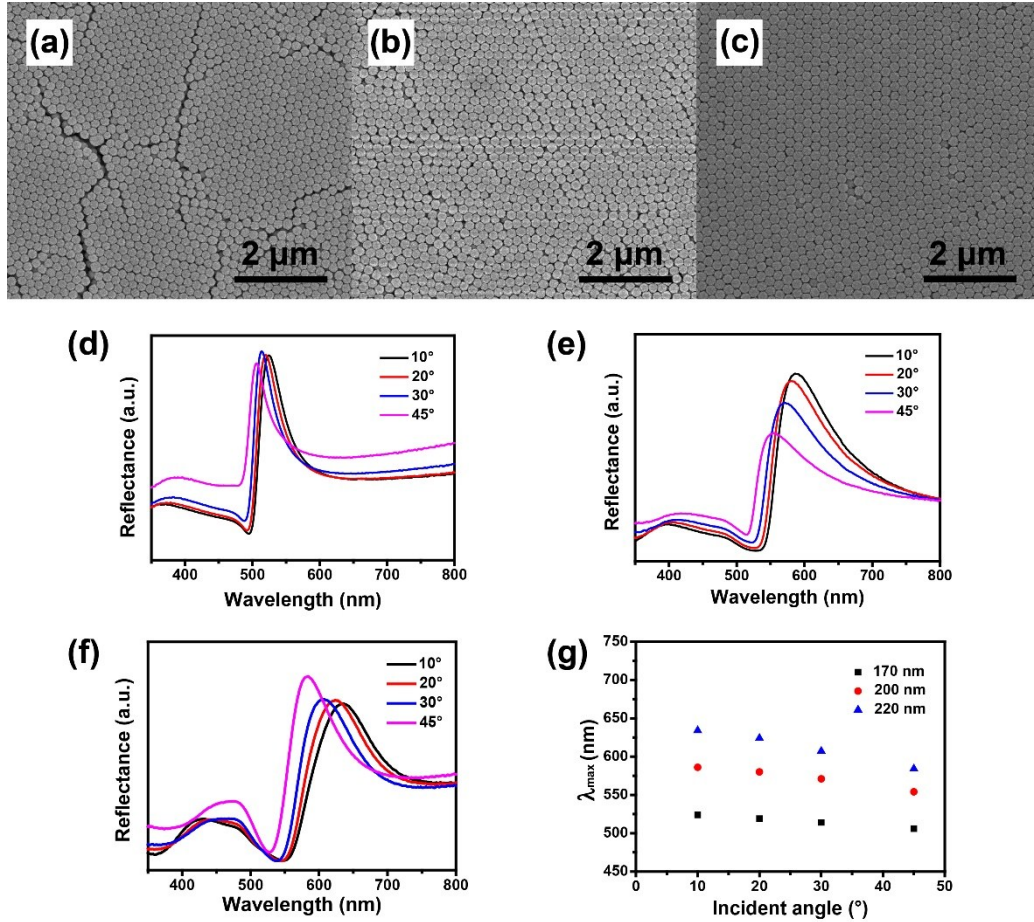

**Figure S8** SEM images of CdS photonic crystal films fabricated with CdS spheres in different diameters. (a)170 nm; (b)200 nm; (c)220 nm. (d~f) are the reflection spectra of CdS photonic crystal films built from 170 nm, 200 nm and 220 nm spheres; (g) Plots showing  $\lambda_{\max}$  of the reflection spectra for different CdS photonic crystal films versus the incident angles

**Table S6** Measured and calculated stop band peak positions of CdS photonic crystal films built from spheres in different diameters.

|     | M170 | C170 | M200 | C200 | M220 | C220 |
|-----|------|------|------|------|------|------|
|     | [nm] | [nm] | [nm] | [nm] | [nm] | [nm] |
| 10° | 524  | 612  | 586  | 720  | 634  | 792  |
| 20° | 519  | 606  | 580  | 713  | 624  | 784  |
| 30° | 514  | 598  | 571  | 703  | 607  | 773  |
| 45° | 506  | 581  | 554  | 684  | 584  | 752  |

M170, M200 and M220 stand for measured results of CdS photonic crystal films built from spheres in these three diameters; C170, C200 and C220 stand for the corresponding calculated results.
